# Supplementary material for: Direct UV-spectroscopic measurement of selected ionic-liquid vapors
Source: Royal Society of Chemistry journal article supplement (doi:10.1039/c001101k), 2010-01-01
Supplement: c001101k.pdf [file c001101k.pdf]

## Supporting Information for

# Direct UV-Spectroscopic Measurement of Selected Ionic-Liquid Vapors

Congmin Wang<sup>1,2</sup>, Huimin Luo<sup>3</sup>, Haoran Li<sup>1</sup>, and Sheng Dai<sup>2\*</sup>

<sup>1</sup>Department of Chemistry, Zhejiang University, Hangzhou 310027, P. R. China,

<sup>2</sup>Chemical Sciences Division, Oak Ridge National Laboratory, Oak Ridge, Tennessee 37831,

<sup>3</sup>Nuclear Science and Technology Division, Oak Ridge National Laboratory, Oak Ridge, Tennessee 37831

**Email:** [Dais@ornl.gov](mailto:Dais@ornl.gov)

### **Determination of halide content in ILs**

The trace amount of halide in ILs was determined by the semi-quantitative Nessler cylinder method.<sup>1</sup> In a typical determination of halide content in ILs, 2.5 g [Bmim<sup>+</sup>][Tf<sub>2</sub>N<sup>-</sup>], 30 ml ethanol, and 1 g nitric acid (65%) were added into a Nessler cylinder. Then 1 g silver nitrate (0.1 mol L<sup>-1</sup>) is added, and the mixture diluted to 50 ml with deionised water. For the 10 ppm standard, 25 µl of the standard chloride solution (1 g L<sup>-1</sup>), 30 ml ethanol, and 0.5 g nitric acid (65%) are combined in a Nessler cylinder. Then 1 g silver nitrate (0.1 mol L<sup>-1</sup>) is added, and the mixture diluted to 50 ml with deionised water. Similarly, 20, 40, 60, 80, 100 ppm standard solutions are prepared. All solutions are allowed to stand in the dark for 0.5 hour, before comparing with the standard solutions. For example, the results for [Bmim<sup>+</sup>][Tf<sub>2</sub>N<sup>-</sup>] show that the halide content is less than 20 ppm.

### **Determination of degradation of ILs**

For imidazolium based ionic liquids, the byproducts including 1-methylimidazole would produce, if the degradation of ILs such as [Bmim<sup>+</sup>][Tf<sub>2</sub>N<sup>-</sup>] happened.<sup>2,3</sup> The possible 1-methylimidazole impurity was analyzed by HPLC method.<sup>1</sup> The following HPLC conditions for the determination of 1-methylimidazole were used. Column, Phenomenex Gemini 5 µ C18 110 A 250 × 4.6 mm 5 micron; Eluent, 30% A (acetonitrile) and 70% B (0.02 M sodium dihydrogenphosphate); Flow rate, 1.0 ml min<sup>-1</sup>; Injected volume, 3.0 µl; Detection, UV 210 nm; Retention times, 1-methylimidazole, 2.23 min, [Bmim<sup>+</sup>], 2.68 min. No signal at 2.23 min for used [Bmim<sup>+</sup>][Tf<sub>2</sub>N<sup>-</sup>] indicated that no degradation happened. The detection limit for the determination of degradation of used ILs is about 0.025 wt%.

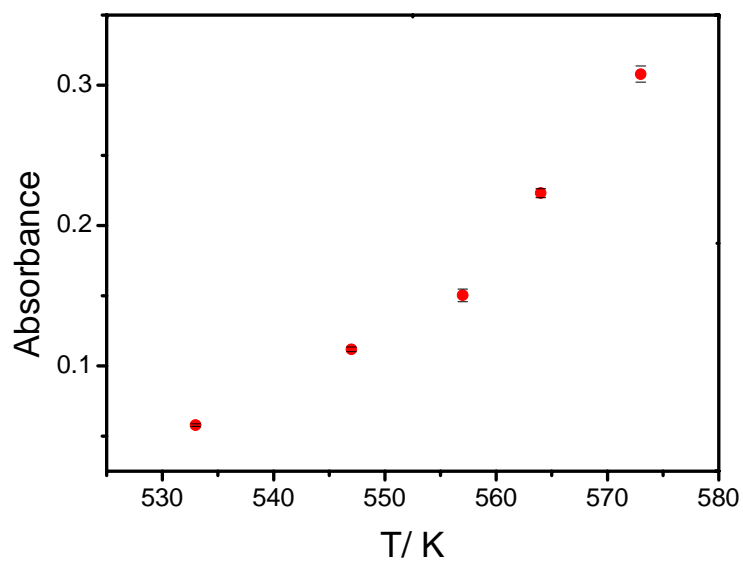

**Fig. S1** The reproducibility of UV determination for [Bmim<sup>+</sup>][Tf<sub>2</sub>N<sup>-</sup>] vapor at 211 nm.

**References for Supporting Information:**

- (1) Stark, A.; Behrend, P.; Braun, O.; Muller, A.; Ranke, J.; Ondruschka, B.; Jastorff, B. *Green Chem.* 2008, *10*, 1152-1161.
- (2) Oxley, J. D.; Prozorov, T.; Suslick, K. S. *J. Am. Chem. Soc.* 2003, *125*, 11138-11139.
- (3) Huddleston, J. G.; Visser, A. E.; Reichert, W. M.; Willauer, H. D.; Broker, G. A.; Rogers, R. D. *Green Chem.* 2001, *3*, 156-164.
